# Supplementary material for: Arabidopsis S2Lb links AtCOMPASS-like and SDG2 activity in H3K4me3 independently from histone H2B monoubiquitination
Source: PubMed Central journal article supplement (PMC6528313; doi:10.1186/s13059-019-1705-4), 2019-05-21

**Additional file 12. Original blots from Figure 3, 5, 6 and S5.** All blots presented have not been cropped and the signals have not been modified. The same chromatin extract was loaded in parallel onto similar LiDs Tris-Tricine gels and blotted with the indicated antibodies.

**Figure 3a**

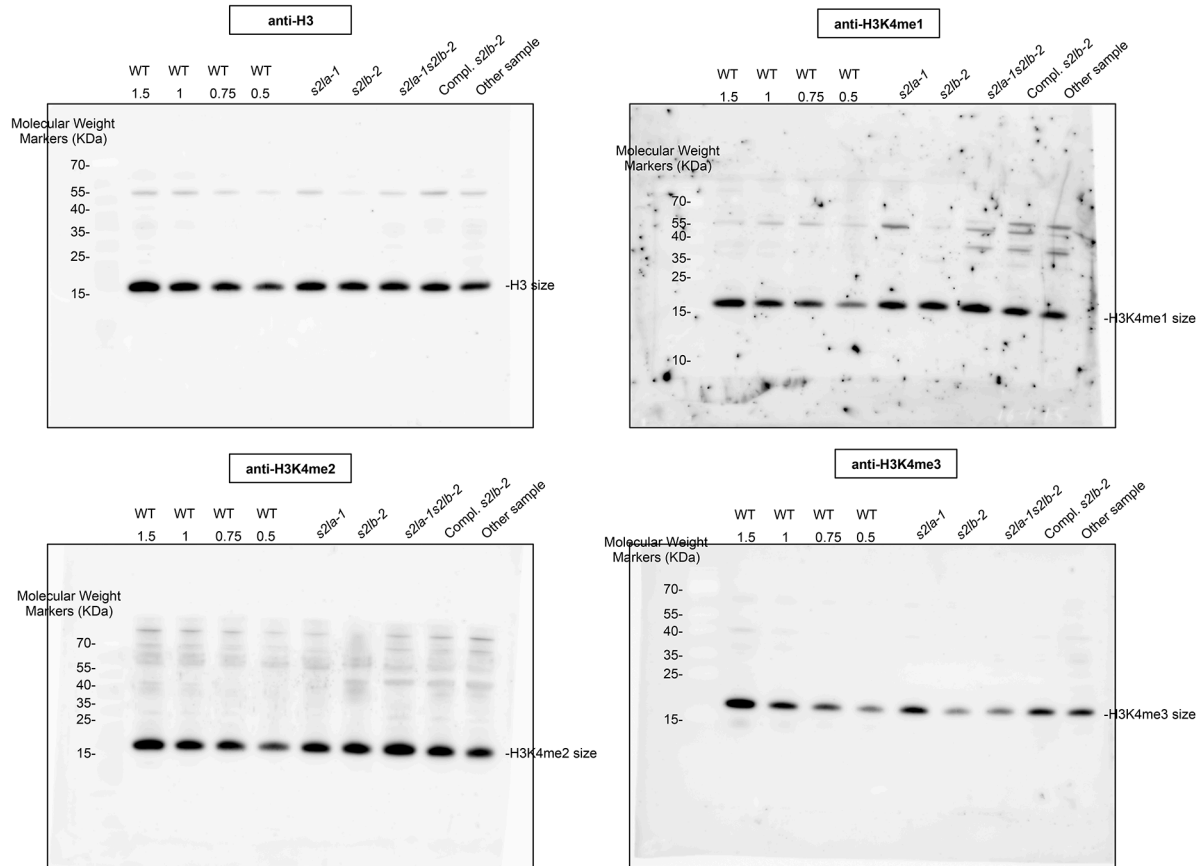

**Figure 5a**

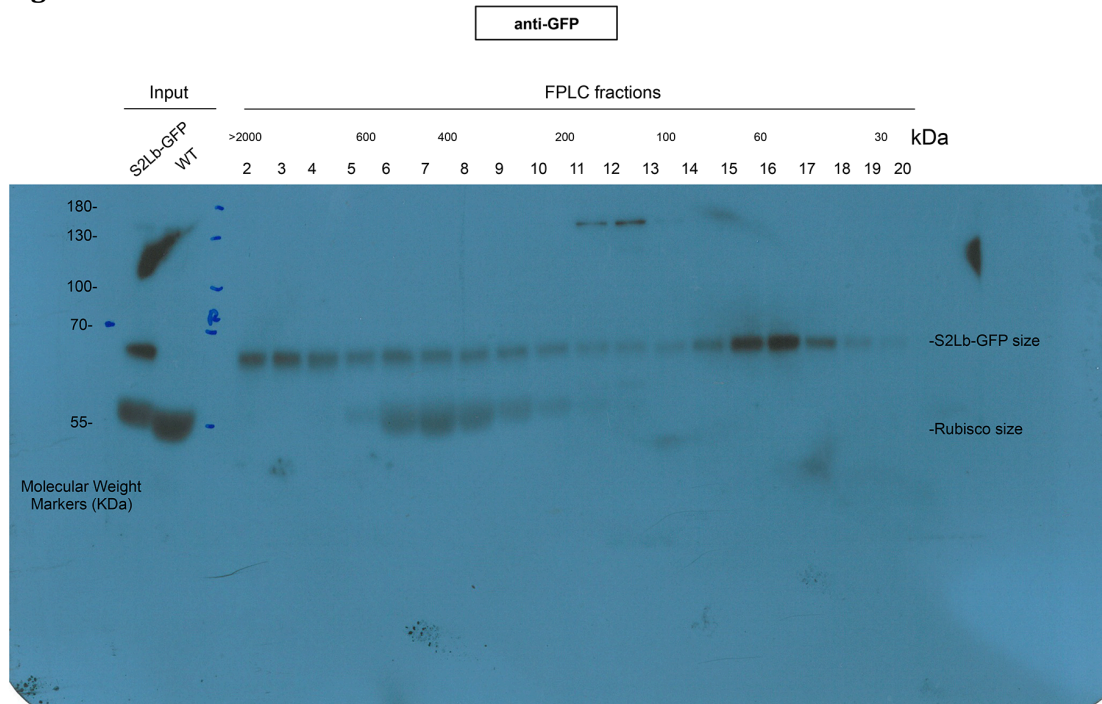

**Figure 5b**

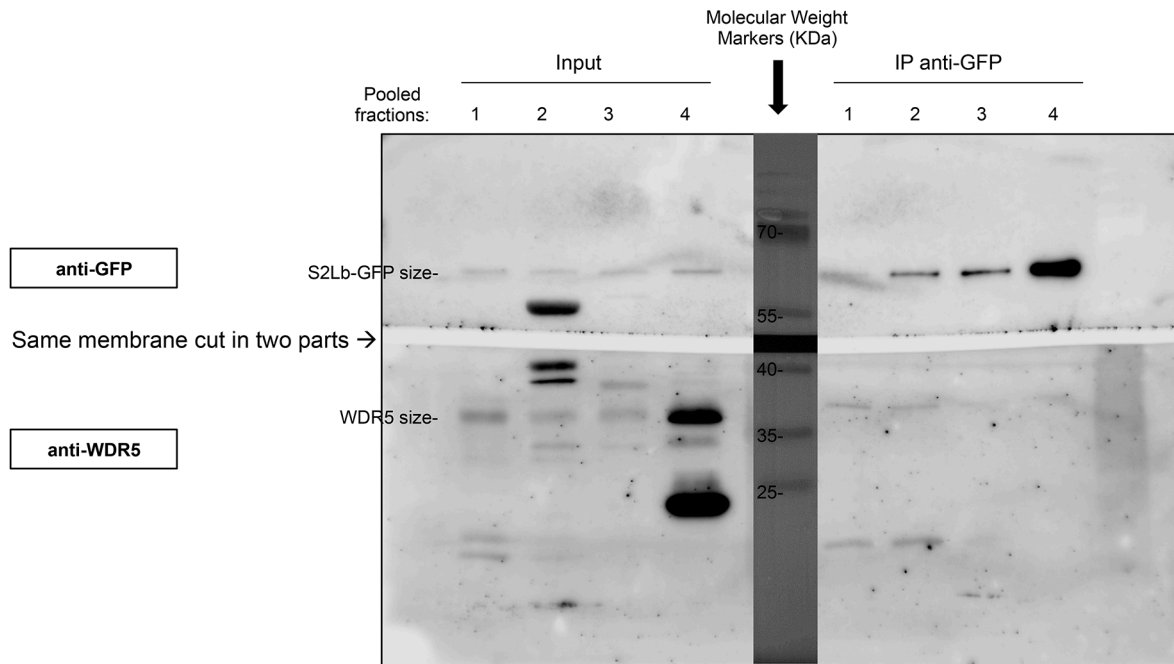

**Figure 5d**

**A** Long exposure

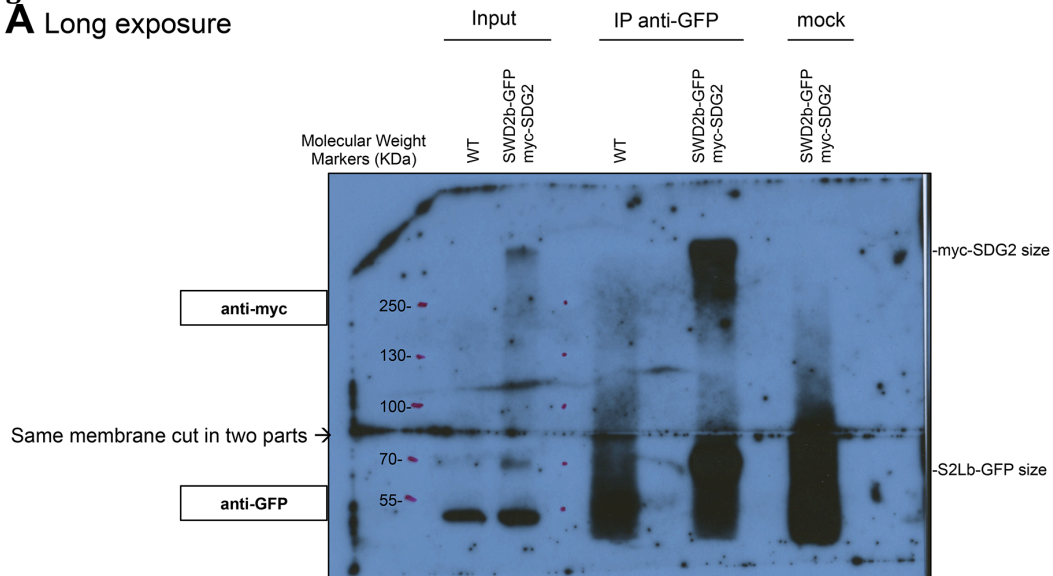

**B** Short exposure

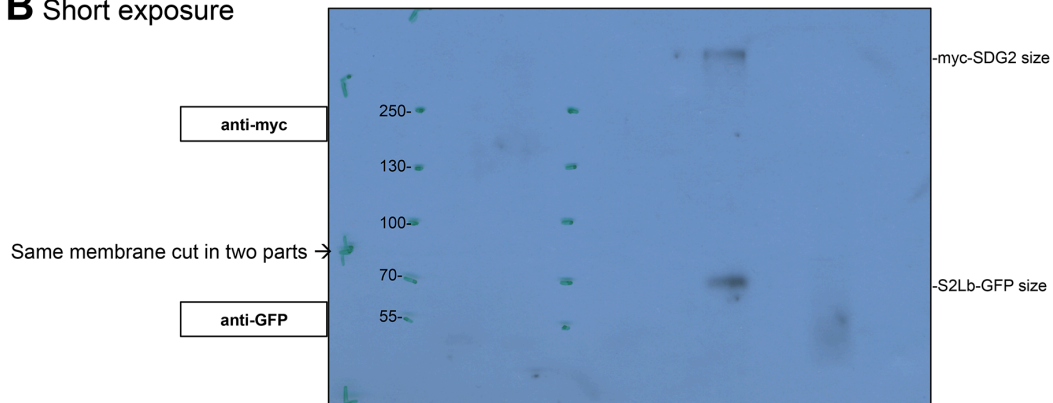

**Figure 5e**

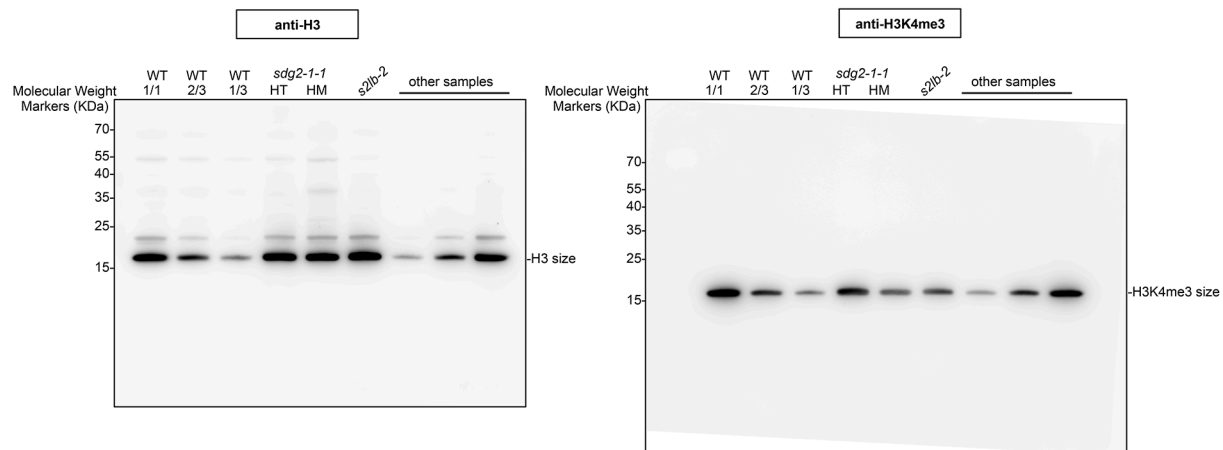

**Figure 6b**

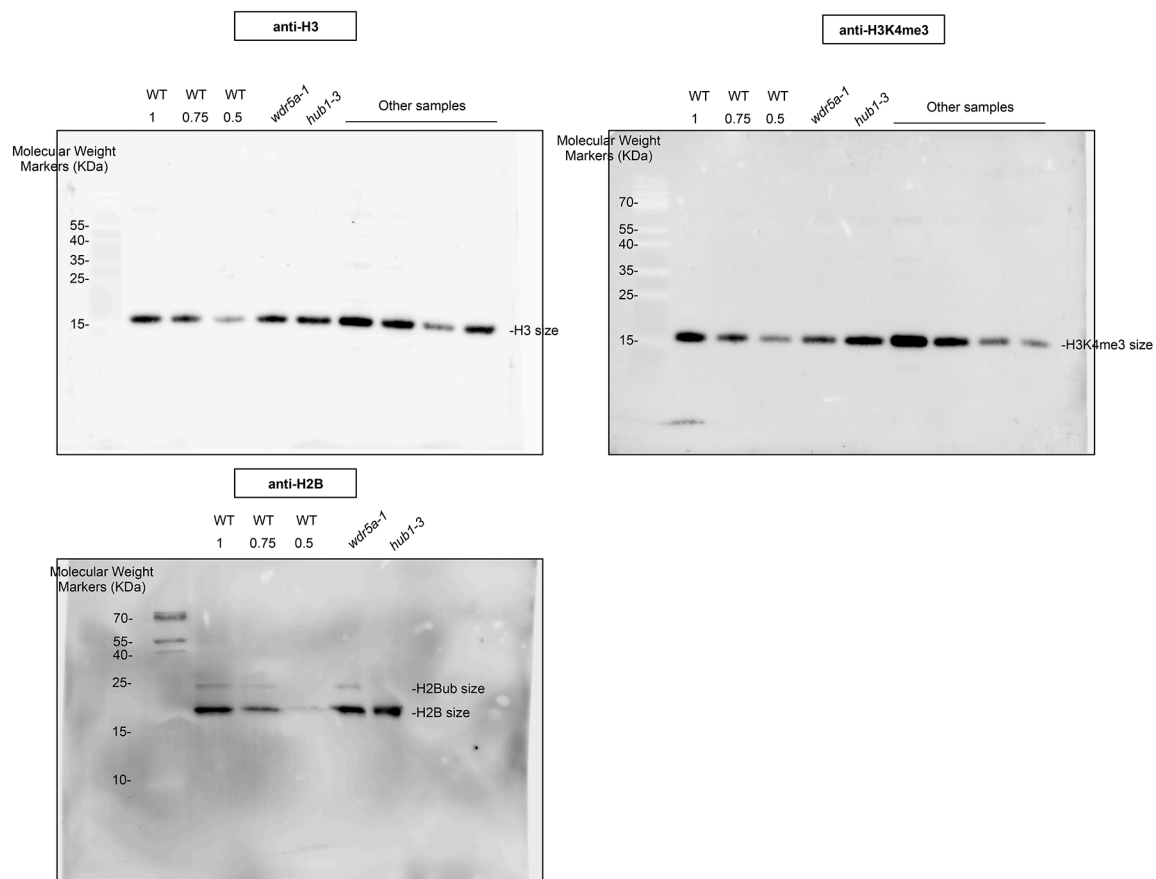

**Figure 6c**

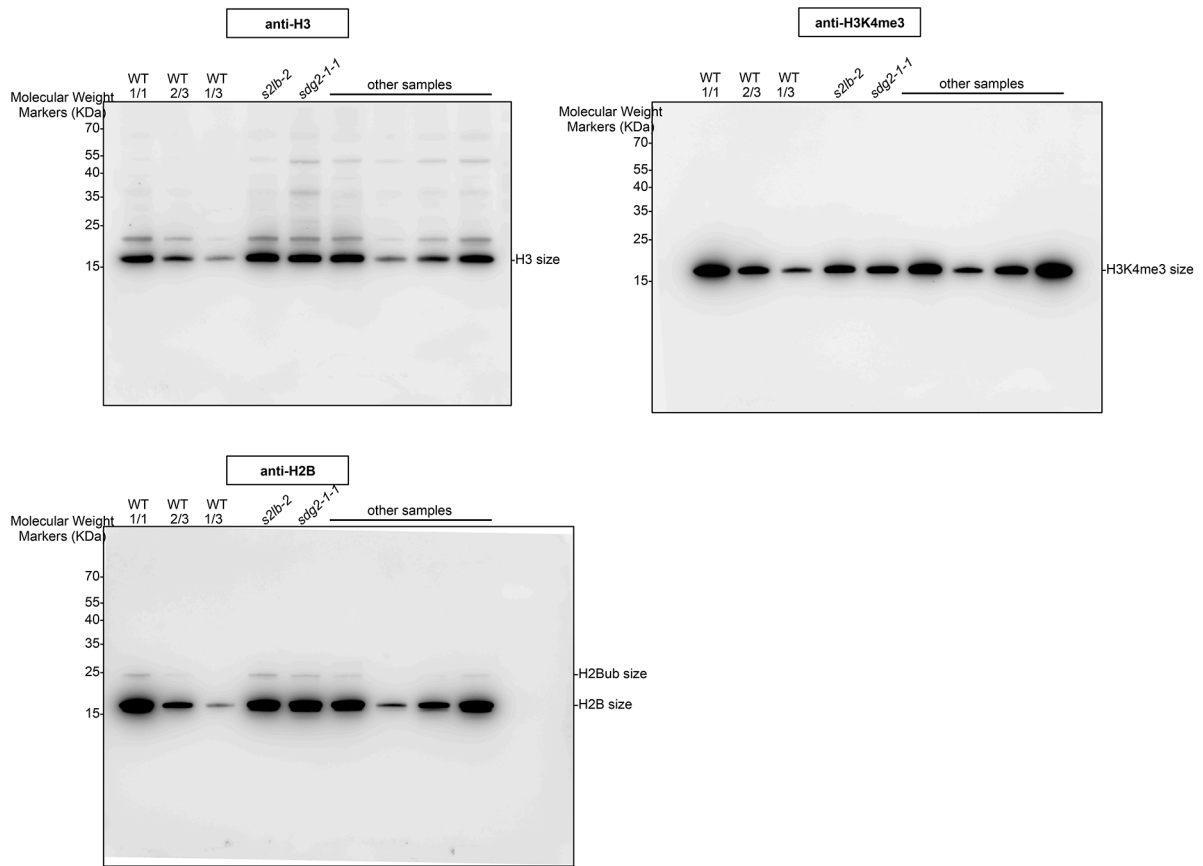

**Figure S5**

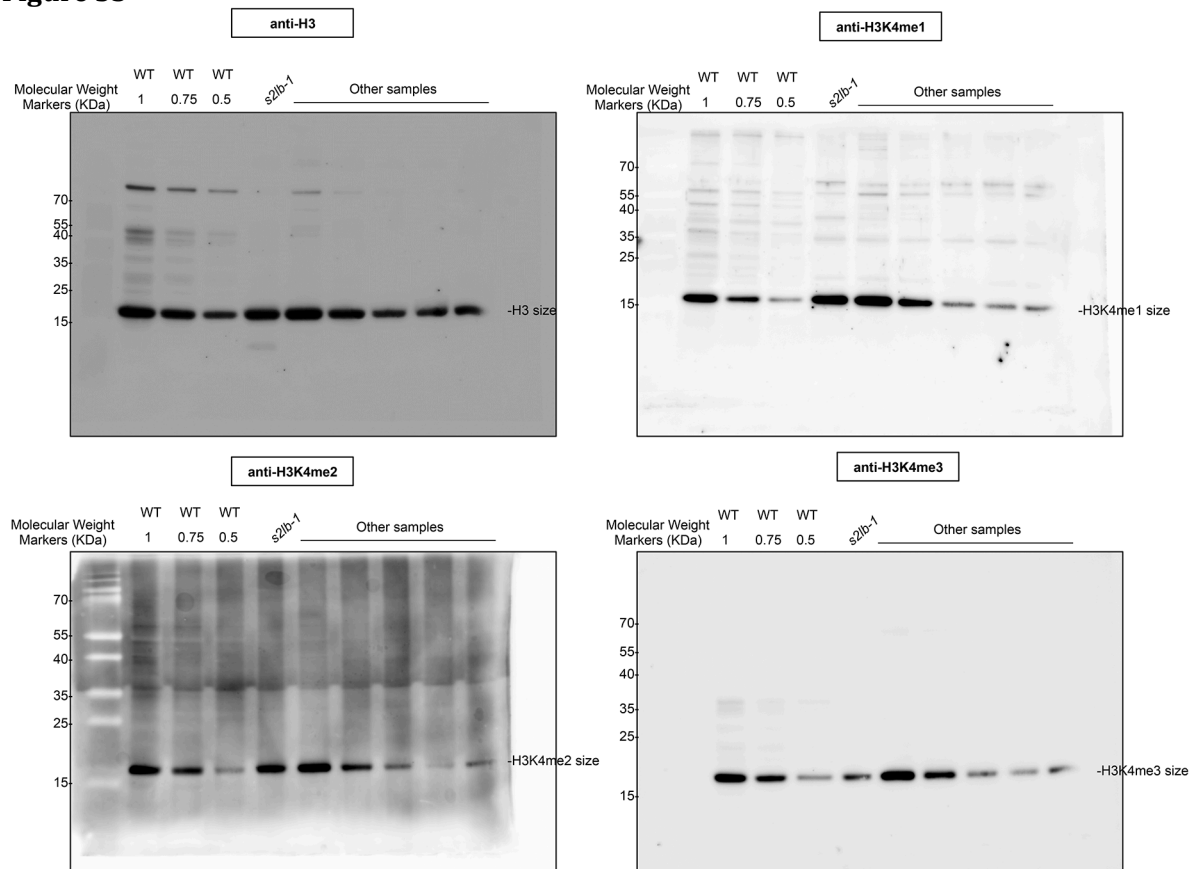

Supplement: 13059_2019_1705_MOESM12_ESM.pdf [file 13059_2019_1705_MOESM12_ESM.pdf]
